# Supplementary material for: Husbands’ involvement in antenatal care and its association with women’s utilization of skilled birth attendants in Sidama zone, Ethiopia: a prospective cohort study
Source: PubMed Central journal article supplement (PMC6091095; doi:10.1186/s12884-018-1954-3), 2018-08-03
Supplement: 12884_2018_1954_MOESM2_ESM.pdf [file 12884_2018_1954_MOESM2_ESM.pdf]

Additional file 2. SPSS output: logistic regression, Model evaluation and Goodness-of-fit test

| Predictor                                                                    | B      | SE.B  | Wald's X <sup>2</sup> | df.        | P-value        | e <sup>B</sup> (OR) | 95% CI.   |
|------------------------------------------------------------------------------|--------|-------|-----------------------|------------|----------------|---------------------|-----------|
| <i>Constant</i>                                                              | -2.969 | 0.405 | 53.850                | 1          | 0.000          | 0.051               |           |
| Husband involvement in ANC (1= yes, 0= no)                                   | 1.836  | 0.199 | 84.923                | 1          | 0.000          | 6.273               | 4.2, 9.3* |
| Place of residence (1= urban, 0= rural)                                      | 0.533  | 0.205 | 6.739                 | 1          | 0.009          | 1.704               | 1.1, 2.5* |
| Education (0= no formal education)                                           |        |       | 11.260                | 3          | 0.010          |                     |           |
| Education (1) primary                                                        | -0.445 | 0.263 | 2.877                 | 1          | 0.090          | 0.641               | 0.4, 1.1  |
| Education (2) secondary                                                      | 0.228  | 0.278 | 0.672                 | 1          | 0.412          | 1.256               | 0.7, 2.2  |
| Education (3) tertiary                                                       | 0.444  | 0.325 | 1.864                 | 1          | 0.172          | 1.559               | 0.8, 3.0  |
| Religion (0= Muslim)                                                         |        |       | 14.178                | 3          | 0.003          |                     |           |
| Religion (1) Protestant                                                      | 0.546  | 0.305 | 3.203                 | 1          | 0.073          | 1.726               | 0.9, 3.1  |
| Religion(2) Catholic                                                         | 1.230  | 0.424 | 8.407                 | 1          | 0.004          | 3.421               | 1.5, 7.8* |
| Religion(3) Orthodox                                                         | 1.336  | 0.417 | 10.250                | 1          | 0.001          | 3.804               | 1.7, 8.6* |
| Plan of pregnancy (1= yes, 0= no)                                            | 0.908  | 0.206 | 19.498                | 1          | 0.000          | 2.480               | 1.7, 3.7* |
| Number of under 5 years children                                             | 0.912  | 0.220 | 17.147                | 1          | 0.000          | 2.490               | 1.6, 3.8* |
| Number of ANC visits                                                         | 1.197  | 0.346 | 11.999                | 1          | 0.001          | 3.310               | 1.7, 6.5* |
| <b>Tests</b>                                                                 |        |       | <b>X<sup>2</sup></b>  | <b>df.</b> | <b>P-value</b> |                     |           |
| <b>Overall model evaluation</b>                                              |        |       |                       |            |                |                     |           |
| ▪ Likelihood ratio test                                                      |        |       | 241.306               | 11         | 0.000          |                     |           |
| ▪ Score test                                                                 |        |       | 211.066               | 17         | 0.000          |                     |           |
| <b>Goodness-of-fit test</b>                                                  |        |       |                       |            |                |                     |           |
| ▪ Hosmer & Lemeshow                                                          |        |       | 15.274                | 8          | 0.054          |                     |           |
| *Cox and Snell R <sup>2</sup> = 0.305, and Nagelkerke R <sup>2</sup> = 0.406 |        |       |                       |            |                |                     |           |

\*p-value < 0.05, indicates the presence of significant association between the particular factor and use of skilled birth attendants
