# Supplementary material for: Husbands’ involvement in antenatal care and its association with women’s utilization of skilled birth attendants in Sidama zone, Ethiopia: a prospective cohort study
Source: PubMed Central journal article supplement (PMC6091095; doi:10.1186/s12884-018-1954-3), 2018-08-03
Supplement: 12884_2018_1954_MOESM3_ESM.pdf [file 12884_2018_1954_MOESM3_ESM.pdf]

Additional file 3. Multicollinearity statistics: Tolerance and Variance Inflation Factors, by selected independent variables

| Model                 | Unstandardized Coefficients |            | Standardized Coefficients | t      | Sig. | Collinearity Statistics |                  |
|-----------------------|-----------------------------|------------|---------------------------|--------|------|-------------------------|------------------|
|                       | B                           | Std. Error | Beta                      |        |      | Tolerance               | VIF <sup>a</sup> |
| (Constant)            | .043                        | .053       |                           | .819   | .413 |                         |                  |
| Husband's involvement | .360                        | .034       | .355                      | 10.530 | .000 | .943                    | 1.060*           |
| Place of resident     | .106                        | .036       | .106                      | 2.948  | .003 | .829                    | 1.207            |
| Age Category          | -.043                       | .036       | -.042                     | -1.185 | .236 | .847                    | 1.180            |
| Educational level     | .087                        | .037       | .086                      | 2.384  | .017 | .830                    | 1.205            |
| Religion              | -.048                       | .036       | -.045                     | -1.320 | .187 | .921                    | 1.086            |
| Women occupation type | .025                        | .044       | .021                      | .584   | .559 | .805                    | 1.243            |
| Number of u5 child    | .150                        | .040       | .139                      | 3.750  | .000 | .783                    | 1.278**          |
| Planned pregnancy     | .170                        | .037       | .162                      | 4.548  | .000 | .851                    | 1.175            |
| Time of 1st ANC visit | .046                        | .037       | .043                      | 1.231  | .219 | .876                    | 1.142            |
| Number of ANC visits  | .162                        | .053       | .107                      | 3.069  | .002 | .877                    | 1.140            |

Dependent Variable: use of skilled birth attendants

<sup>a</sup>VIF: Variance Inflation Factor

\* *Minimum VIF value*, \*\**Maximum VIF value*
