# Supplementary material for: Husbands’ involvement in antenatal care and its association with women’s utilization of skilled birth attendants in Sidama zone, Ethiopia: a prospective cohort study
Source: PubMed Central journal article supplement (PMC6091095; doi:10.1186/s12884-018-1954-3), 2018-08-03
Supplement: 12884_2018_1954_MOESM4_ESM.pdf [file 12884_2018_1954_MOESM4_ESM.pdf]

## Additional file 4: Interview questionnaire for women participants

### Households Identification

Questionnaire code ----- Woreda/ Town Administration -----

Place of Usual residence: (1) Urban (2) Rural

Kebele ----- House number -----

**Instruction:** – please circle the responses for questions with alternatives and write for open-ended questions on the space provided.

| PHASE I - IDENTIFICATION OF STUDY PARTICIPANTS |                                          |                                                                                                                                                                                                           |           |
|------------------------------------------------|------------------------------------------|-----------------------------------------------------------------------------------------------------------------------------------------------------------------------------------------------------------|-----------|
| 1. Socio-demographic and economic Information  |                                          |                                                                                                                                                                                                           |           |
| No                                             | Questions                                | Choices                                                                                                                                                                                                   | Code skip |
| 101                                            | Age (In completed years)                 | ..... Years                                                                                                                                                                                               |           |
| 102                                            | Educational level                        | 1. Above grade 12<br>2. Grade 11-12<br>3. Grade 7-10<br>4. Grade 0-6<br>5. Able to read and write<br>6. Unable to read and write                                                                          |           |
| 103                                            | Religion                                 | 1. Orthodox<br>2. Catholic<br>3. Protestant<br>4. Muslim<br>5. If other, specify _____                                                                                                                    |           |
| 104                                            | Ethnicity                                | 1. Sidama                      5. Gurage<br>2. Wolita                      6. Amhara<br>3. Gedio                        7. Oromo<br>4. Kembata                    8. Tigray.<br>9. If other specify _____ |           |
| 105                                            | Occupation type                          | 1. House wife<br>2. Farmer<br>3. Government employee<br>4. Privately owned business<br>5. NGO employee<br>6. If other specify _____                                                                       |           |
| 106                                            | Age of your husband (In completed years) | ..... Years                                                                                                                                                                                               |           |
| 107                                            | Education level of your husband          | 1. Above grade 12<br>2. Grade 11-12<br>3. Grade 7-10<br>4. Grade 0-6<br>5. Able to read and write<br>6. Unable to read and write                                                                          |           |

|     |                                                        |                                                                                                                    |  |
|-----|--------------------------------------------------------|--------------------------------------------------------------------------------------------------------------------|--|
| 108 | Occupation type of your husband                        | 1. Farmer<br>2. Government employee<br>3. Privately owned business<br>4. NGO employee<br>5. If other specify _____ |  |
| 109 | Household size                                         | -----                                                                                                              |  |
| 110 | How many Under 5 year children do you have, currently? | -----                                                                                                              |  |
| 111 | How much is your monthly income? (in ETB)              | .....                                                                                                              |  |

| <b>2. Obstetric Information</b>                           |                                                                             |                                                         |        |
|-----------------------------------------------------------|-----------------------------------------------------------------------------|---------------------------------------------------------|--------|
| No                                                        | Questions                                                                   | Choices                                                 | Remark |
| 201                                                       | Number of deliveries? (Including those who died, if any)                    | _____ Children/Child                                    |        |
| 202                                                       | Have you ever had abortion or stillbirth? (Induced or non-induced abortion) | 1. Yes<br>2. No ----->                                  | 204    |
| 203                                                       | If yes, how many?                                                           | _____ Abortions/Stillbirths                             |        |
| 204                                                       | How old is your last child? (in months)                                     | -----                                                   |        |
| 205                                                       | When did you have your last normal menstrual period?                        | 1. ___/___/___ (dd/mm/yyyy)<br>2. I don't know/Not sure |        |
| 206                                                       | How many months pregnant are you?                                           | 1. _____ months<br>2. I don't remember/Not sure         |        |
| 207                                                       | Is the pregnancy planned?                                                   | 1. Yes      2. No                                       |        |
| 208                                                       | In your current pregnancy, did you receive ANC services?                    | 1. Yes<br>2. No                                         |        |
| <b>3. At nine months of pregnancy (G.A. of pregnancy)</b> |                                                                             |                                                         |        |
| 209                                                       | When was your first ANC visit?                                              | .....DD/ .....MM.                                       |        |
| 210                                                       | How many ANC visits have you received? (in number)                          | _____                                                   |        |
| 211                                                       | When you went for ANC visit, are you decided jointly with your husband?     | 1. Yes -----><br>2. No                                  | 301    |
| 212                                                       | If not, who made the last decision?                                         | 1. Wife<br>2. Husband<br>3. Other specify .....         |        |

| <b>PHASE II - INTERVIEW OF PREGNANT WOMEN, 3 TO 5 DAYS AFTER DELIVERY</b> |                                                                                               |                        |     |
|---------------------------------------------------------------------------|-----------------------------------------------------------------------------------------------|------------------------|-----|
| <b>4. Women's utilization of and husbands involvement in ANC services</b> |                                                                                               |                        |     |
| 301                                                                       | During your ANC visits, have you get enough information about delivery care and PNC services? | 1. Yes<br>2. No        |     |
| 302                                                                       | Was your husband escort you to health facility during ANC visit?                              | 1. Yes<br>2. No -----> | 304 |
| 303                                                                       | Was he attend the health information with you at health facility?                             | 1. Yes<br>2. No -----> | 305 |
| 304                                                                       | If no for Q.No.302, what was the reason?                                                      | -----                  |     |
| 305                                                                       | If no for Q.No.303, what was the reason?                                                      | -----                  |     |
| 306                                                                       | Were you get regular ANC services? If not, what was the reason?                               | -----                  |     |

| <b>5. Husbands' involvement in delivery care</b> |                                                                                                    |                                                                       |           |
|--------------------------------------------------|----------------------------------------------------------------------------------------------------|-----------------------------------------------------------------------|-----------|
| 401                                              | When are you delivered your last child?                                                            | .../.../.../ (dd/mm/yyyy)                                             |           |
| 402                                              | Where are you gave birth your last child?                                                          | 1. Health facility -----><br>2. Home<br>3. Other specify _____        | 403       |
| 403                                              | Who was attend your birth?                                                                         | _____                                                                 |           |
| 404                                              | If at home; why?                                                                                   | .....                                                                 |           |
| 405                                              | Were you made a joint decision for your delivery place?                                            | 1. Yes -----><br>2. No<br>3. I don't remember                         | 406       |
| 406                                              | If not, who made the final decision?                                                               | 1. Wife<br>2. Husband<br>3. Other specify .....                       |           |
| 407                                              | If you delivered at HF; was your husband escort you for labor and delivery to the health facility? | 1. Yes<br>2. No ----->                                                | 409 & 410 |
| 408                                              | If yes, was your husband enter and attend your labour and delivery in the room?                    | 1. Yes -----><br>2. No                                                | 501       |
| 409                                              | If 'no' for Q.No. 407, why?                                                                        | .....                                                                 | 410       |
| 410                                              | If 'no' for Q.No. 406, why?                                                                        | .....                                                                 |           |
| 411                                              | Who escorted you during your labour and delivery to the health facility?                           | 1. My mother<br>2. Relatives<br>3. Neighbor<br>4. Other specify ..... |           |

| <b>PHASE III - INTERVIEW OF PREGNANT WOMEN, AT PNC PERIODS (AT 6<sup>TH</sup> WKS AFTER DELIVERY)</b> |                                                                      |                                                                 |     |
|-------------------------------------------------------------------------------------------------------|----------------------------------------------------------------------|-----------------------------------------------------------------|-----|
| <b>5. Husbands' involvement in postnatal care</b>                                                     |                                                                      |                                                                 |     |
| 501                                                                                                   | Were you get PNC service in your last childbirth?                    | 1. Yes<br>2. No ----->                                          | 510 |
| 502                                                                                                   | If yes, when was your 1 <sup>st</sup> PNC visit?                     | .....dd/mm/yyyy                                                 |     |
| 503                                                                                                   | How many PNC visits are you received? (number/count)                 | -----                                                           |     |
| 504                                                                                                   | Was your husband escort you during PNC visit?                        | 1. Yes<br>2. No ----->                                          | 507 |
| 505                                                                                                   | Was your husband attend PNC information with you in the health unit? | 1. Yes -----><br>2. No                                          | 508 |
| 506                                                                                                   | If no, for 'Q.No.505', what was the reason?                          | -----                                                           |     |
| 507                                                                                                   | If no, for 'Q.No.504', what was the reason?                          | -----                                                           |     |
| 508                                                                                                   | Were you made a joint decision for your PNC services?                | 1. Yes -----><br>2. No                                          | 601 |
| 509                                                                                                   | If no, who made the final decision?                                  | 1. Wife<br>2. Husband<br>3. Relatives<br>4. Other specify ..... |     |
| 510                                                                                                   | If 'no' for Q.No. 501, what was the reason?                          | -----                                                           |     |
